# Supplementary material for: Bivalve Shellfish Safety in Portugal: Variability of Faecal Levels, Metal Contaminants and Marine Biotoxins during the Last Decade (2011–2020)
Source: MDPI journal article supplement (doi:10.3390/toxins15020091), 2023-01-18
Supplement: s1 [file s1]

# **Supplementary Material: Bivalve shellfish safety in Portugal: variability of faecal levels, metal contaminants and marine biotoxins during the last decade (2011-2020)**

**Ana Catarina Braga, Susana Margarida Rodrigues, Helena Maria Lourenço, Pedro Reis Costa and Sónia Pedro**

Mensual averages of toxins concentration in the different production areas over the decade are presented in Fig. S1 and Fig. S2, for ASP and PSP, respectively.

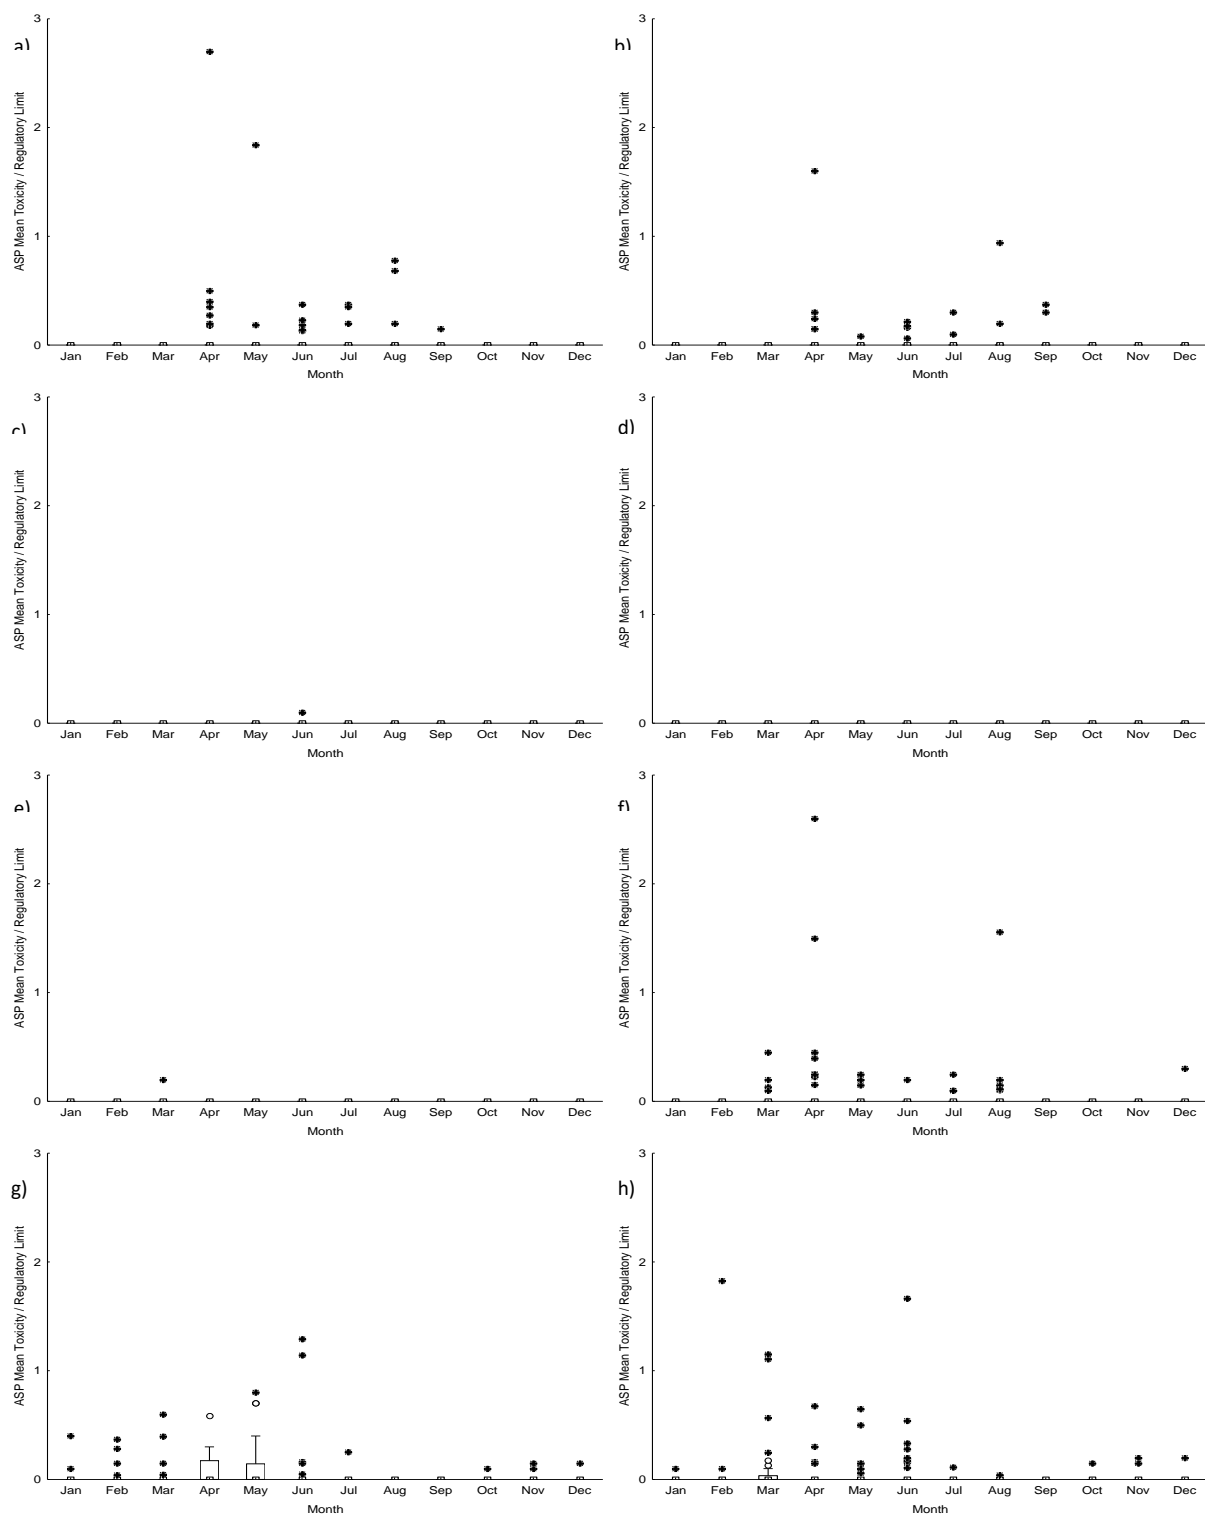

**Figure S1.** ASP concentrations in relation to the EU regulatory limit for mussels, between 2011 and 2020, from a) RIAV1; b) RIAV2; c) LOB; d) L5; e) L6, f) L7 and donax clams from: g) L8 and h) L9. (■ Median; Non-Outlier Range; ○ Outliers; \* Extremes).

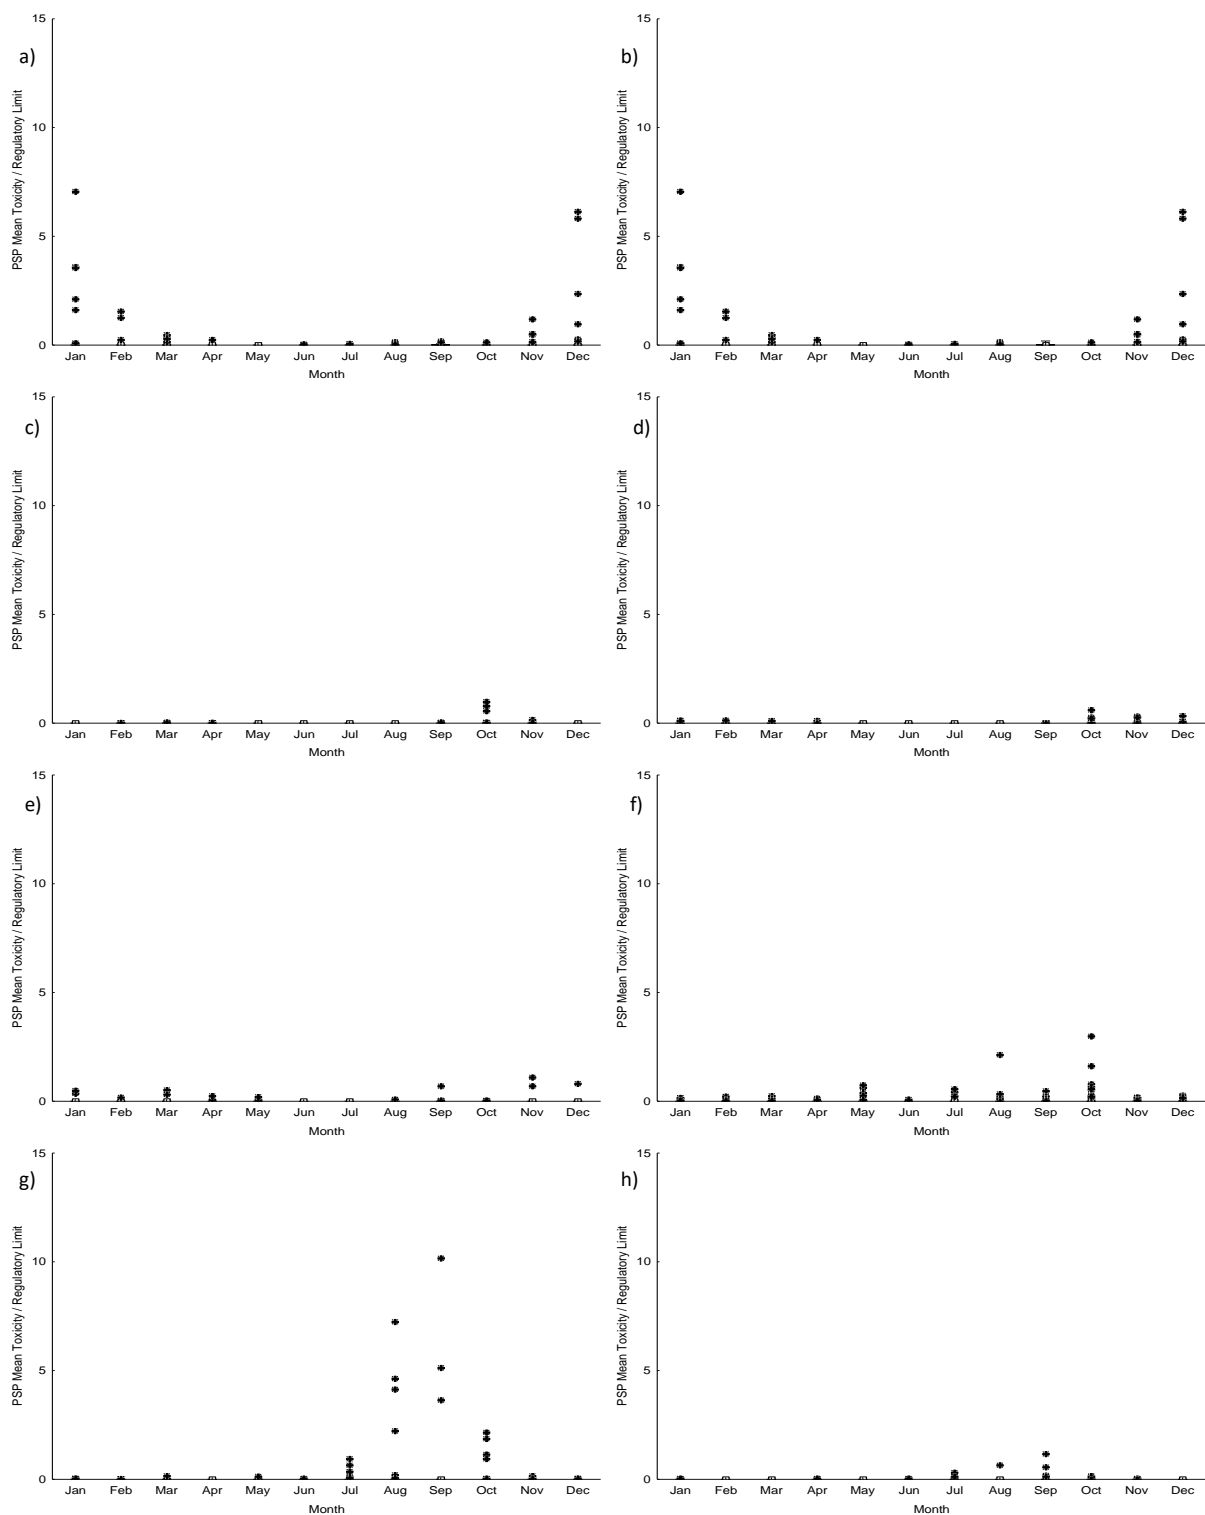

**Figure S2.** PSP concentrations in relation to the EU regulatory limit for mussels, between 2011 and 2020, from a) RIAV1; b) RIAV2; c) LOB; d) L5; e) L6, f) L7 and donax clams from g) L8 and h) L9. ( $\square$  Median; Non-Outlier Range;  $\circ$  Outliers; \* Extremes).
